# Supplementary material for: Emulsion Polymerization Using an Amphiphilic Oligoether Ionic Liquid as a Surfactant
Source: MDPI journal article supplement (doi:10.3390/polym14173475), 2022-08-25
Supplement: s1 [file s1]

Supporting Information for

**EMULSION POLYMERIZATION USING IONIC LIQUID C1EG™ AND  
DTAB AS SURFACTANTS**

Ariadna Jiménez-Victoria, René D. Peralta-Rodríguez, Enrique Saldívar-Guerra, Gladis Y. Cortez-Mazatán, Lluvia de Abril A. Soriano-Melgar, Carlos Guerrero-Sánchez

**Table S1.** Conversion and average diameter after 120 min of reaction.

| <b>Reaction number</b> | <b>Repetition</b> | <b>Conversion*, %</b> | <b>Average* ± Std. Dev.</b> | <b>D<sub>p</sub>*, nm</b> | <b>Average* ± Std. Dev.</b> |
|------------------------|-------------------|-----------------------|-----------------------------|---------------------------|-----------------------------|
| 15                     | a                 | 96.46                 | 96.91 ± 0.63                | 65.46                     | 66.21 ± 1.05                |
|                        | b                 | 97.35                 |                             | 66.95                     |                             |
| 19                     | a                 | 95.94                 | 96.42 ± 0.67                | 58.88                     | 59.24 ± 0.51                |
|                        | b                 | 96.89                 |                             | 59.60                     |                             |
| 21                     | a                 | 84.59                 | 85.86 ± 1.76                | 63.72                     | 64.26 ± 1.16                |
|                        | b                 | 87.87                 |                             | 63.47                     |                             |
|                        | c                 | 85.11                 |                             | 65.60                     |                             |
| 25                     | a                 | 86.98                 | 89.44 ± 3.47                | 54.33                     | 53.71 ± 0.88                |
|                        | b                 | 91.89                 |                             | 53.09                     |                             |
| 27                     | a                 | 97.82                 | 97.60 ± 0.33                | 71.11                     | 71.49 ± 0.85                |
|                        | b                 | 97.77                 |                             | 72.47                     |                             |
|                        | c                 | 97.22                 |                             | 70.90                     |                             |
| 28                     | a                 | 90.52                 | 90.25 ± 0.39                | 61.23                     | 61.18 ± 0.07                |
|                        | b                 | 89.97                 |                             | 61.13                     |                             |
| 30                     | a                 | 95.18                 | 95.19 ± 0.01                | 61.20                     | 60.90 ± 0.42                |
|                        | b                 | 95.20                 |                             | 60.60                     |                             |
| 32                     | a                 | 92.07                 | 92.11 ± 0.05                | 54.61                     | 54.27 ± 0.48                |
|                        | b                 | 92.14                 |                             | 53.93                     |                             |

|    |   |       |                  |       |                  |
|----|---|-------|------------------|-------|------------------|
| 34 | a | 87.71 | $88.21 \pm 0.71$ | 69.70 | $69.58 \pm 0.18$ |
|    | b | 88.71 |                  | 69.45 |                  |
| 36 | a | 97.04 | $94.90 \pm 3.03$ | 72.26 | $72.48 \pm 0.31$ |
|    | b | 92.75 |                  | 72.70 |                  |

\* Two significant decimal figures are used here. They are rounded to one significant figure in the main manuscript.

**Table S2.** Effect of surfactant type on conversion and particle diameter for styrene polymerizations.

| Monomers | Surfactant  | Conversion [%]          | PD [nm]                 |
|----------|-------------|-------------------------|-------------------------|
| Styrene  | <b>C1EG</b> | $89.7 \pm 5.2$ <b>a</b> | $66.3 \pm 2.5$ <b>a</b> |
|          | <b>DTAB</b> | $92.0 \pm 3.8$ <b>a</b> | $58.0 \pm 3.5$ <b>b</b> |

\* Different letters indicate significant differences ( $p \leq 0.05$ ). ANOVA and *post hoc* Tukey's test.

**Table S3.** Effect of surfactant type on conversion and particle diameter for MMA polymerizations.

| Monomers | Surfactant  | Conversion [%]          | PD [nm]                 |
|----------|-------------|-------------------------|-------------------------|
| MMA      | <b>C1EG</b> | $96.1 \pm 1.9$ <b>a</b> | $68.8 \pm 5.4$ <b>a</b> |
|          | <b>DTAB</b> | $92.1 \pm 0.1$ <b>b</b> | $54.3 \pm 0.5$ <b>b</b> |

\* Different letters indicate significant differences ( $p \leq 0.05$ ). ANOVA and *post hoc* Tukey's test.

**Table S4.** Effects of surfactant and initiator concentrations on conversion and particle diameter for styrene polymerizations with C1EG surfactant.

| <b>[S]<br/>×CMC</b> | <b>Conversion [%]</b> | <b>PD [nm]</b>       | <b>Initiator<br/>[mol×10<sup>4</sup>]</b> | <b>Conversion [%]</b> | <b>PD [nm]</b>       |
|---------------------|-----------------------|----------------------|-------------------------------------------|-----------------------|----------------------|
| <b>10.9</b>         | 96.9 ± 0.6 <b>a</b>   | 66.2 ± 1.1 <b>ab</b> | <b>3.85</b>                               | 96.9 ± 0.6 <b>a</b>   | 66.2 ± 1.1 <b>ab</b> |
| <b>7.7</b>          | 85.9 ± 1.8 <b>b</b>   | 64.3 ± 1.2 <b>b</b>  | <b>5.53</b>                               | 85.9 ± 1.8 <b>b</b>   | 64.3 ± 1.2 <b>b</b>  |
| <b>7.7</b>          | 88.2 ± 0.7 <b>b</b>   | 69.6 ± 0.2 <b>a</b>  | <b>3.68</b>                               | 88.2 ± 0.7 <b>b</b>   | 69.6 ± 0.2 <b>a</b>  |

\* Different letters indicate significant differences (p≤0.05). ANOVA and *post hoc* Tukey's test.

**Table S5.** Effects of surfactant and initiator concentrations on conversion and particle diameter for styrene polymerizations with DTAB surfactant.

| <b>[S]<br/>×CMC</b> | <b>Conversion [%]</b> | <b>PD [nm]</b>      | <b>Initiator<br/>[mol×10<sup>4</sup>]</b> | <b>Conversion [%]</b> | <b>PD [nm]</b>      |
|---------------------|-----------------------|---------------------|-------------------------------------------|-----------------------|---------------------|
| <b>3.5</b>          | 96.4 ± 0.7 <b>a</b>   | 59.2 ± 0.5 <b>a</b> | <b>3.93</b>                               | 96.4 ± 0.7 <b>a</b>   | 59.2 ± 0.5 <b>a</b> |
| <b>3</b>            | 89.4 ± 3.5 <b>a</b>   | 53.7 ± 0.9 <b>b</b> | <b>3.14</b>                               | 89.4 ± 3.5 <b>a</b>   | 53.7 ± 0.9 <b>b</b> |
| <b>2</b>            | 90.3 ± 0.4 <b>a</b>   | 61.2 ± 0.1 <b>a</b> |                                           |                       |                     |

\* Different letters indicate significant differences (p≤0.05). ANOVA and *post hoc* Tukey's test.

**Table S6.** Effects of surfactant and initiator concentrations on conversion and particle diameter for MMA polymerizations with C1EG surfactant.

| <b>[S]<br/>×CMC</b> | <b>Conversion [%]</b> | <b>PD [nm]</b>      | <b>Initiator<br/>[mol×10<sup>4</sup>]</b> | <b>Conversion [%]</b> | <b>PD [nm]</b>      |
|---------------------|-----------------------|---------------------|-------------------------------------------|-----------------------|---------------------|
| <b>7.7</b>          | 94.9 ± 2.4 <b>a</b>   | 72.5 ± 7.9 <b>a</b> | <b>3.68</b>                               | 94.9 ± 2.4 <b>a</b>   | 72.5 ± 7.9 <b>a</b> |
| <b>10.1</b>         | 97.6 ± 0.3 <b>a</b>   | 71.5 ± 0.9 <b>a</b> | <b>3.80</b>                               | 97.6 ± 0.3 <b>a</b>   | 71.5 ± 0.9 <b>a</b> |
| <b>7.7</b>          | 95.2 ± 0.0 <b>a</b>   | 60.9 ± 0.4 <b>b</b> | <b>5.57</b>                               | 95.2 ± 0.0 <b>a</b>   | 60.9 ± 0.4 <b>b</b> |

\* Different letters indicate significant differences (p≤0.05). ANOVA and *post hoc* Tukey's test.

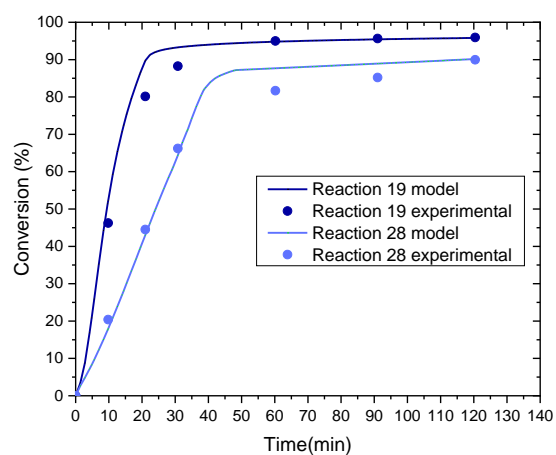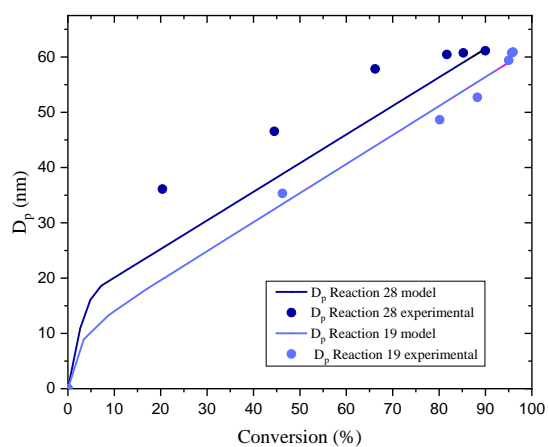

**Figure S1.** Comparison of simulation (POLYRED) and experimental data for conversion vs. time of reaction (left) and  $D_p$  vs. conversion (right) for experiments E19 and E28.

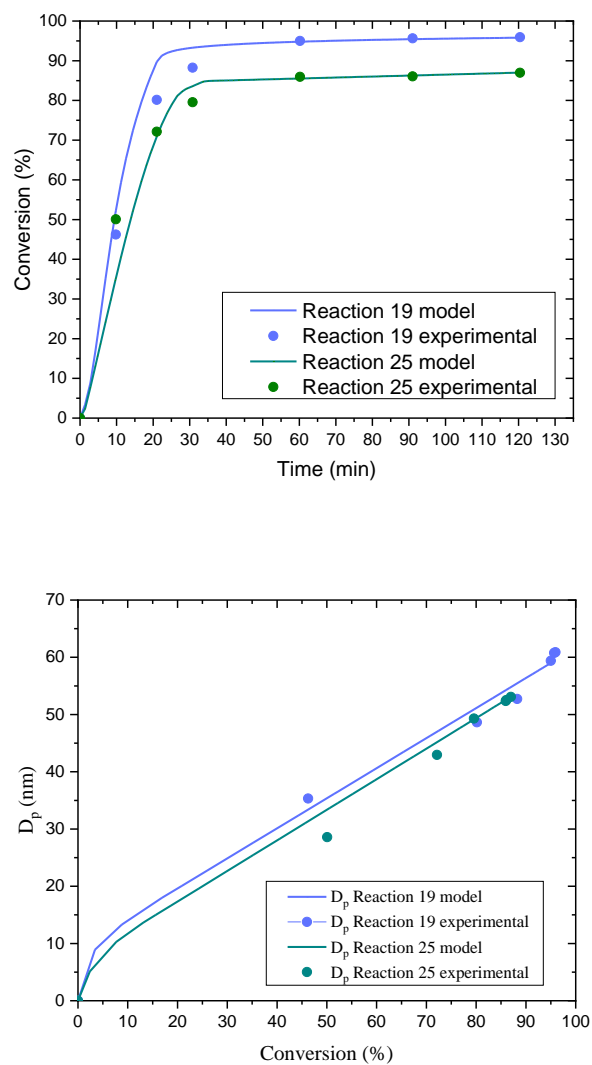

**Figure S2.** Comparison of simulation (POLYRED) and experimental data for conversion vs. time of reaction (upper) and  $D_p$  vs. conversion (lower) for experiments E19 and E25.

**Table S7.** Main physical and kinetic parameters used in the POLYRED simulations (70 °C)

| Parameter [reference]                     | Description                      | Value                   |
|-------------------------------------------|----------------------------------|-------------------------|
| C1EG $r_h$ (nm) [63]                      | Micellar radius                  | 1.90                    |
| DTAB $r_h$ (nm) [64]                      | Idem                             | 1.30                    |
| $K_d$ ( $s^{-1}$ ) V-50                   | Initiator kinetic constant       | $2.038 \times 10^{+11}$ |
| $k_{p, St}$ ( $L mol^{-1} s^{-1}$ ) [65]  | St propagation kinetic constant  | 126                     |
| $k_{p, MMA}$ ( $L mol^{-1} s^{-1}$ ) [65] | St propagation kinetic constant  | 646                     |
| $K_t, MMA$ ( $L mol^{-1} s^{-1}$ ) [66]   | MMA termination kinetic constant | $1.05 \times 10^{-9}$   |
| $K_t, St$ ( $L mol^{-1} s^{-1}$ ) [67]    | St termination kinetic constant  | $1.75 \times 10^{-9}$   |
| $D_{p, St}$ ( $g L^{-1}$ ) [67]           | PSt density                      | 1054                    |
| $D_{p, MMA}$ ( $g L^{-1}$ ) [67]          | PMMA density                     | 1170                    |
| T, K                                      | Temperature of reaction          | 343.15                  |
| $X_{St}$ [67]                             |                                  | 4.8                     |
| $X_{MMA}$ [67]                            |                                  | 2.4                     |

## References

- [63] Sharker, K.K.; Yusa, S.; Phan, C.M. Micellar formation of cationic surfactants. *Heliyon* **2019**, *5*, e02425.
- [64] Bappaditya, N.; Dey, A.; Moulik, S.P. Counter-ion effect on micellization of ionic surfactants: A comprehensive understanding with two representatives sodium dodecyl sulfate (SDS) and dodecyltrimethylammonium bromide (DTAB). *J. Surfact. Deterg.* **2013**, *16*, 785-794.
- [65] Sirirat, T.; Vatanatham, T.; Hansupalak, N.; Rempel G.L.; Arayapranee, W. Kinetic study of styrene and methyl methacrylate emulsion polymerization induced by cumene hydroperoxide/tetraethylenepentamine. *J. Polym. Res.* **2014**, *22*, 2-11.
- [66] Herrera-Ordóñez, J.; Olayo, R. Methyl methacrylate emulsion polymerization at low monomer concentration: Kinetic modeling of nucleation, particle size distribution, and rate of polymerization. *J. Polym. Sci. Part A Polym. Chem.* **2001**, *39*, 2547-2556.
- [67] Thickett, C.; Gilbert, R.G. Emulsion polymerization: State of the art in kinetics and mechanisms. *Polymer* **2007**, *48*, 6965-6991.
